# Supplementary material
Source: HighWire-hosted journal article supplement (https://www.cmaj.ca/highwire/filestream/57897/field_highwire_adjunct_files/2/insulin-gri-3-at.pdf)
Supplement: insulin-gri-3-at.pdf [file insulin-gri-3-at.pdf]

**Appendix 3:** Characteristics of randomized controlled trials comparing intensive insulin therapy with usual care that were included in the meta-analysis

| Study                            | Country of origin                  | Total no. patients | Type of ICU | Age, yr, mean | Female, % | APACHE II score | Length of stay in ICU, d | Admission diagnosis (% of patients)                       | Intention-to-treat analysis | Jadad score |
|----------------------------------|------------------------------------|--------------------|-------------|---------------|-----------|-----------------|--------------------------|-----------------------------------------------------------|-----------------------------|-------------|
| Arabi 2008 <sup>10</sup>         | Saudi Arabia                       | 523                | Mixed       | 52.4          | 25        | 22.8            | 10.2                     | Sepsis (23), traumatic brain injury (18), surgical (16.8) | Yes                         | 3           |
| Azevedo* 2007 <sup>22</sup>      | Brazil                             | 337                | Mixed       | 56.2†         | 46†       | NR              | NR                       | NR                                                        | Yes                         | 2           |
| Bilotta 2007 <sup>24</sup>       | Italy                              | 78                 | Surgical    | 52.5          | 69        | NR              | NR                       | Postsurgical for SAH (100)                                | Yes                         | 3           |
| Bilotta 2008 <sup>23</sup>       | Italy                              | 97                 | Surgical    | 52.6          | 45        | 60.8‡           | 8.9                      | Traumatic brain injury (100)                              | Yes                         | 3           |
| Bland 2005 <sup>25</sup>         | United States                      | 10                 | Mixed       | 56.7          | 30        | NR              | 32.1                     | Respiratory failure (70), sepsis (10)                     | Yes                         | 2           |
| Brunkhorst 2008 <sup>11</sup>    | Germany                            | 537                | Mixed       | 64.6          | 40        | 20.2            | 14.9                     | Sepsis (100); medical (47), surgical (53)                 | Yes                         | 3           |
| Bruno 2008 <sup>26</sup>         | United States                      | 46                 | Medical     | 59.1          | 43        | 9.3§            | NR                       | Cerebral infarction (100)                                 | Yes                         | 3           |
| De La Rosa 2008 <sup>12</sup>    | Columbia                           | 504                | Mixed       | 46.6          | 40        | 15.7            | 6                        | Medical (49), trauma (35), surgical (16)                  | Yes                         | 3           |
| Devos* 2007 <sup>13</sup>        | Belgium                            | 1101               | Mixed       | 65            | 37        | 16.5            | 6¶                       | Medical 41%, Surgical 59%                                 | Yes                         | 2           |
| Farah 2007 <sup>27</sup>         | Israel                             | 89**               | Medical     | 73.1          | 48        | 22.1            | 7.5                      | NR                                                        | No**                        | 2           |
| Grey 2004 <sup>28</sup>          | United States                      | 61                 | Surgical    | 55.6          | 30        | 15.3            | 29.5                     | General surgery 100%                                      | Yes                         | 2           |
| He, W 2007 <sup>29</sup>         | China                              | 188                | Surgical    | 65.5          | 33        | 17.2            | 4.2                      | Surgical 100%                                             | Yes                         | 2           |
| He, Z 2008 <sup>30</sup>         | China                              | 122                | Mixed       | 54.9          | 38        | 16.9            | 12.3                     | Medical 46%, Surgical 54%                                 | Yes                         | 2           |
| Henderson* 2005 <sup>31</sup>    | Canada                             | 68                 | Mixed       | 56.5          | 31        | 20.8            | 9.5                      | Medical 46%, Surgical 54%                                 | Yes                         | 3           |
| Iapichino 2008 <sup>32</sup>     | Italy                              | 90††               | Mixed       | 62.3          | 35        | 41.8‡           | 14.5                     | Medical 64%, Surgical 36%                                 | No††                        | 3           |
| Mackenzie 2008 <sup>33</sup>     | England                            | 240                | Mixed       | 64.5          | 48        | 21.9            | 6.9                      | Medical 54%, Surgical 38%, Trauma 8%                      | Yes                         | 3           |
| McMullin 2007 <sup>34</sup>      | Canada                             | 20                 | Mixed       | 68.8          | 55        | 31.7            | 11.0                     | Medical 100%                                              | Yes                         | 3           |
| Mitchell 2006 <sup>35</sup>      | Australia                          | 70                 | Mixed       | 65.5          | 40        | 20.5            | 4.5                      | Medical 61%, Surgical 39%                                 | Yes                         | 3           |
| NICE-SUGAR 2009 <sup>18</sup>    | Australia and New Zealand – Canada | 6104               | Mixed       | 60.2          | 37        | 21.1            | 6.0                      | Surgical 37%, Non-surgical 63%                            | Yes                         | 3           |
| Oksanen 2007 <sup>36</sup>       | Finland                            | 90                 | Medical     | 63.7          | 23        | 24.9            | NR                       | Out of hospital cardiac arrest 100%                       | Yes                         | 3           |
| Van den Berghe 2001 <sup>8</sup> | Belgium                            | 1548               | Surgical    | 62.8          | 29        | 9.0             | 3                        | Cardiac surgery 63%                                       | Yes                         | 3           |
| Van den Berghe 2006 <sup>9</sup> | Belgium                            | 1200               | Medical     | 63.5          | 39        | 23.0            | 9¶                       | NR                                                        | Yes                         | 3           |
| Walters 2006 <sup>37</sup>       | Scotland                           | 25                 | Medical     | 75.0          | 60        | 8.0§            | NR                       | Cerebral infarction 100%                                  | Yes                         | 3           |
| Wang, L 2006 <sup>38</sup>       | China                              | 116                | Mixed       | 66.2          | 32        | 15.5            | 11.0                     | NR                                                        | Yes                         | 2           |
| Yu 2005 <sup>39</sup>            | China                              | 55                 | Mixed       | 46.0          | 44        | 10.5            | NR                       | Sepsis 100%                                               | Yes                         | 2           |
| Zhang 2008 <sup>40</sup>         | China                              | 338                | Mixed       | 60.9          | 36        | 10.0            | 3.9                      | Surgical 67%                                              | Yes                         | 2           |

Note: ICU = intensive care unit, NR = not reported in manuscript, TBI = traumatic brain injury.

\*Published abstract. †Data obtained from Wiener meta-analysis. ‡Simplified Acute Physiology Score (SAPS) II score reported.

§National Institute of Health Stroke Score (NIHSS) reported. ¶Personal communication.

\*\*Excluded patients after randomization who did not survive ≥ 3 days. ††Excluded 9 patients per group after randomization who did not survive ≥ 3 days (total patients in published study 72). Author contacted and outcomes obtained for those patients for total no. of patients included in this analysis is 90.
